# Supplementary material
Source: publisher figshare collection journal article supplement (https://acs.figshare.com/ndownloader/files/4604476)
Supplement: Supplementary file 1 [file 4604476]

## SUPPORTING INFORMATION

# Linkage Isomerism in the Binding of Pentapeptide Ac-His(Ala)<sub>3</sub>His-NH<sub>2</sub> to (ethylenediamine)palladium(II): Effect of the Binding Mode on Peptide Conformation<sup>1</sup>

*Huy N. Hoang<sup>ab</sup>, Gavin K. Bryant<sup>a</sup>, Michael J. Kelso<sup>b</sup>, Renee L. Beyer<sup>b</sup>, Trevor G.  
Appleton<sup>\*a</sup>, and David P. Fairlie<sup>b</sup>.*

a Centre for Metals in Biology, School of Molecular & Microbial Sciences, and

b Institute for Molecular Bioscience

The University of Queensland, Brisbane, Qld., Australia 4072

AUTHOR EMAIL ADDRESS t.appleton@uq.edu.au or d.fairlie@imb.uq.edu.au

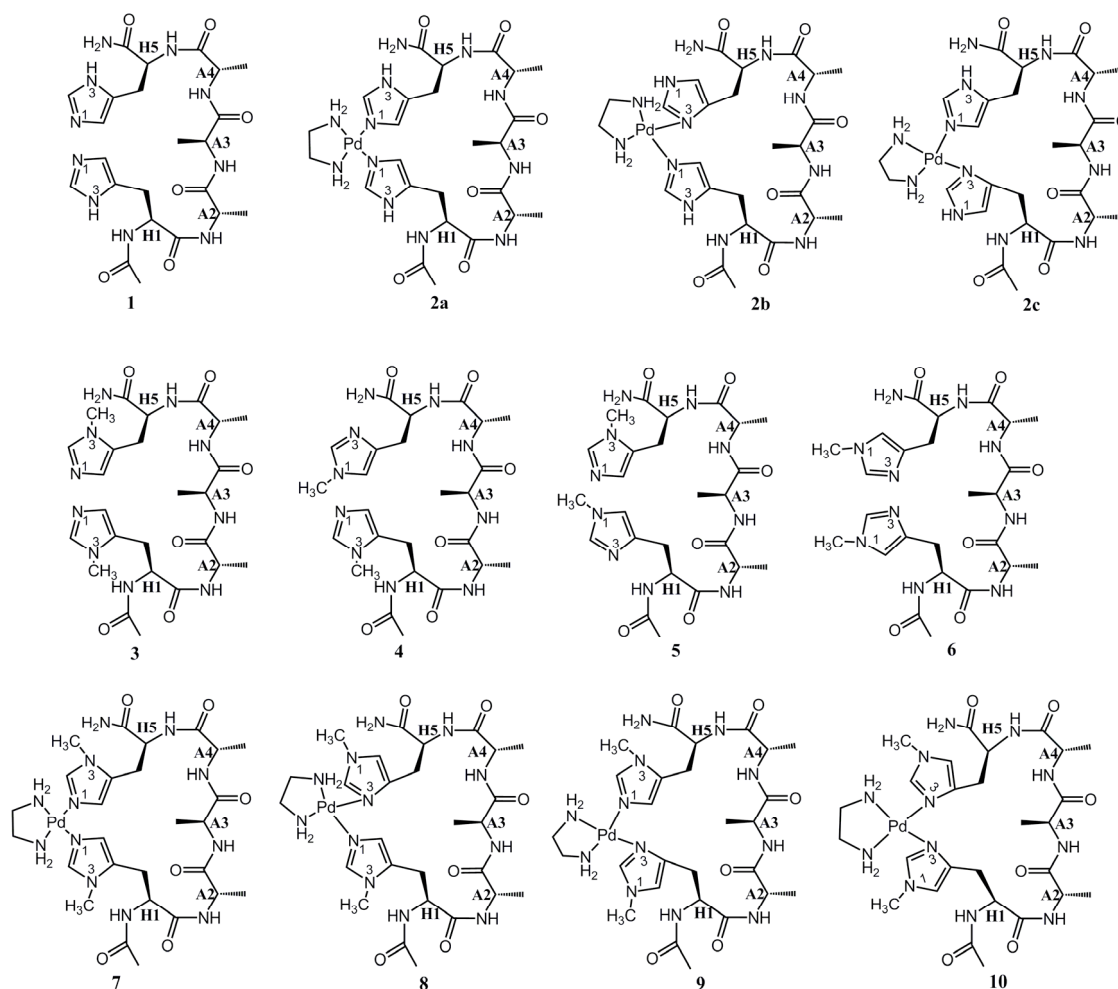

**Scheme S1.** Chemical structures for peptides and metallopeptides **1**, **2a**, **2b**, **2c**, **3**, **4**, **5**, **6**, **7**, **8**, **9** and **10**.

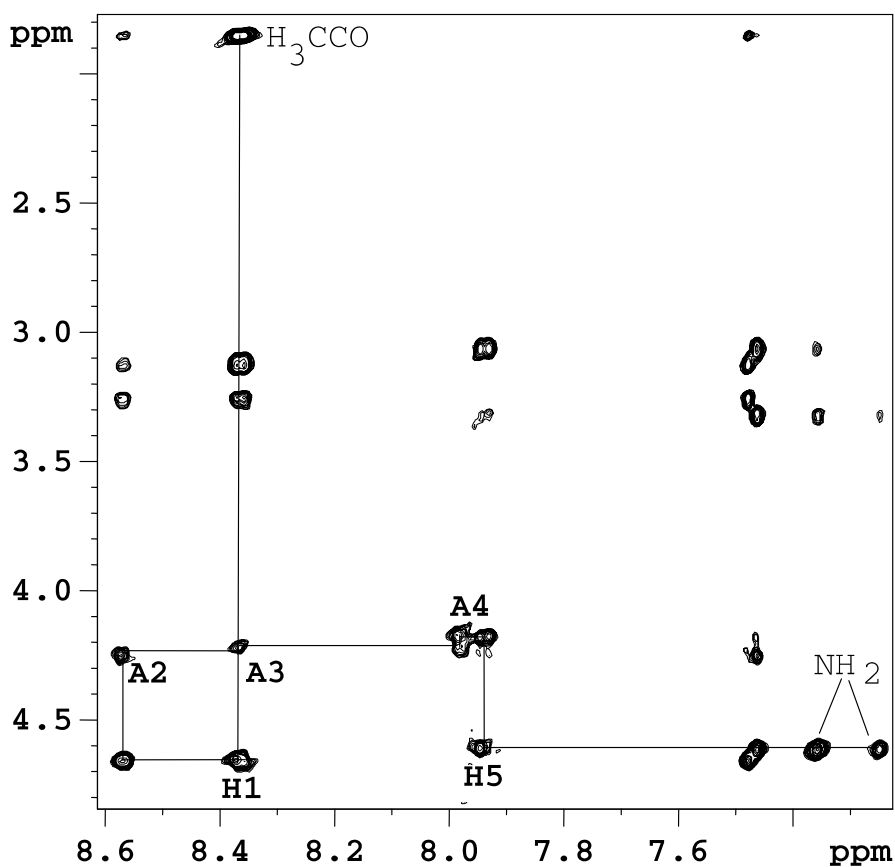

**Figure S1.** 500 MHz T-ROESY spectrum ( $\text{dmf-}d_7$ , 298 K, mixing time 250 ms, spin-lock 16dB (3kHz)) for free peptide **1**. Sequential connectivity for **1** (solid line). Intraresidue NH-CH $\alpha$  cross-peaks are labeled according to standard one letter amino acid code and by their residue numbers in **1**. Sequential cross-peaks from N-terminal acetyl (CH<sub>3</sub>) and C-terminal amide (NH<sub>2</sub>) group are also shown. Note the absence of non-sequential cross-peaks indicating that **1** is unstructured in solution.

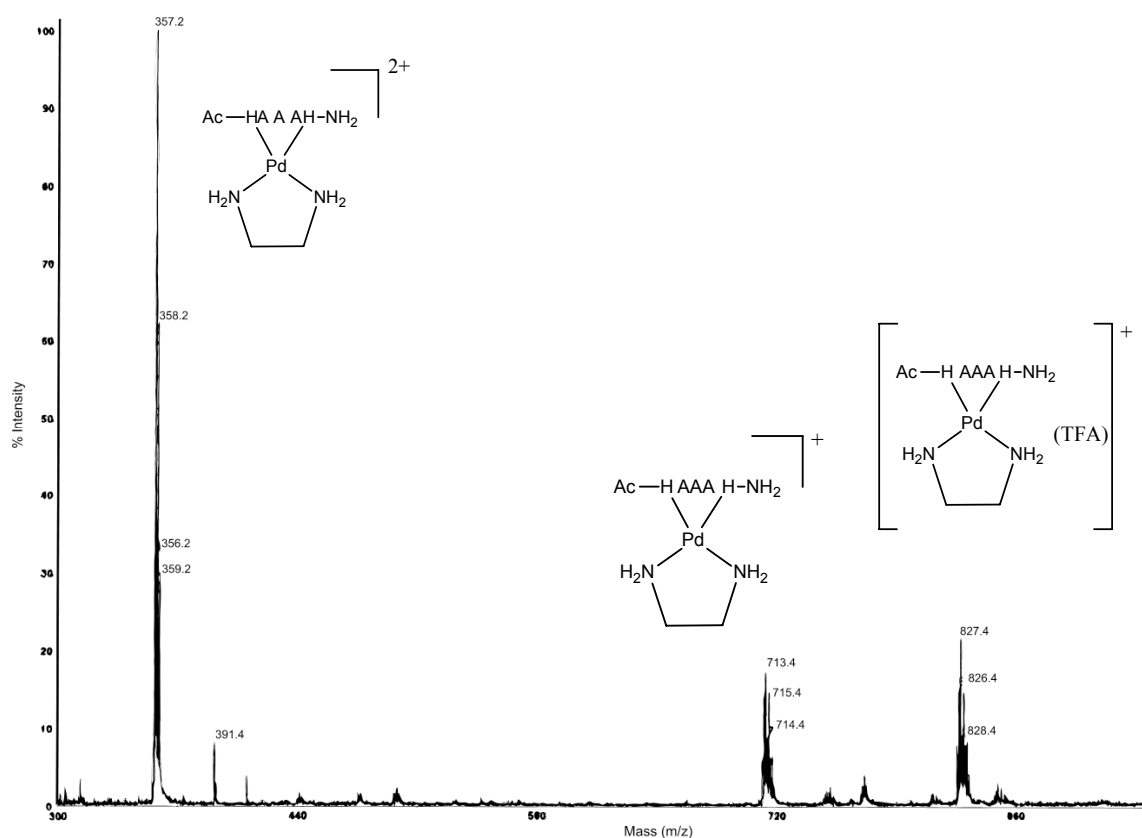

**Figure S2.** The ESMS spectrum for the solution from reacting  $[\text{Pd}(\text{en})(\text{ONO})_2]$  with Ac-HAAA-H-NH<sub>2</sub> (**1**) in water.

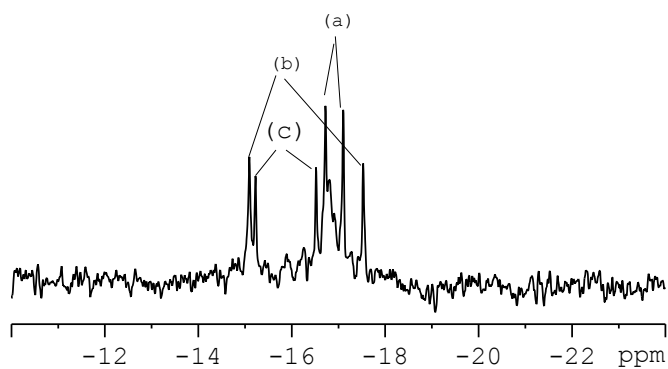

**Figure S3.** 40.5 MHz  $^{15}\text{N}$  (dept) NMR spectrum shows three sets of peaks labeled as (a), (b) and (c) corresponding to three isomers of  $[\text{Pd}(\text{en})(\text{peptide})]^{2+}$ , **2a**, **2b** and **2c** in 90%  $\text{H}_2\text{O}$  10%  $\text{D}_2\text{O}$ .

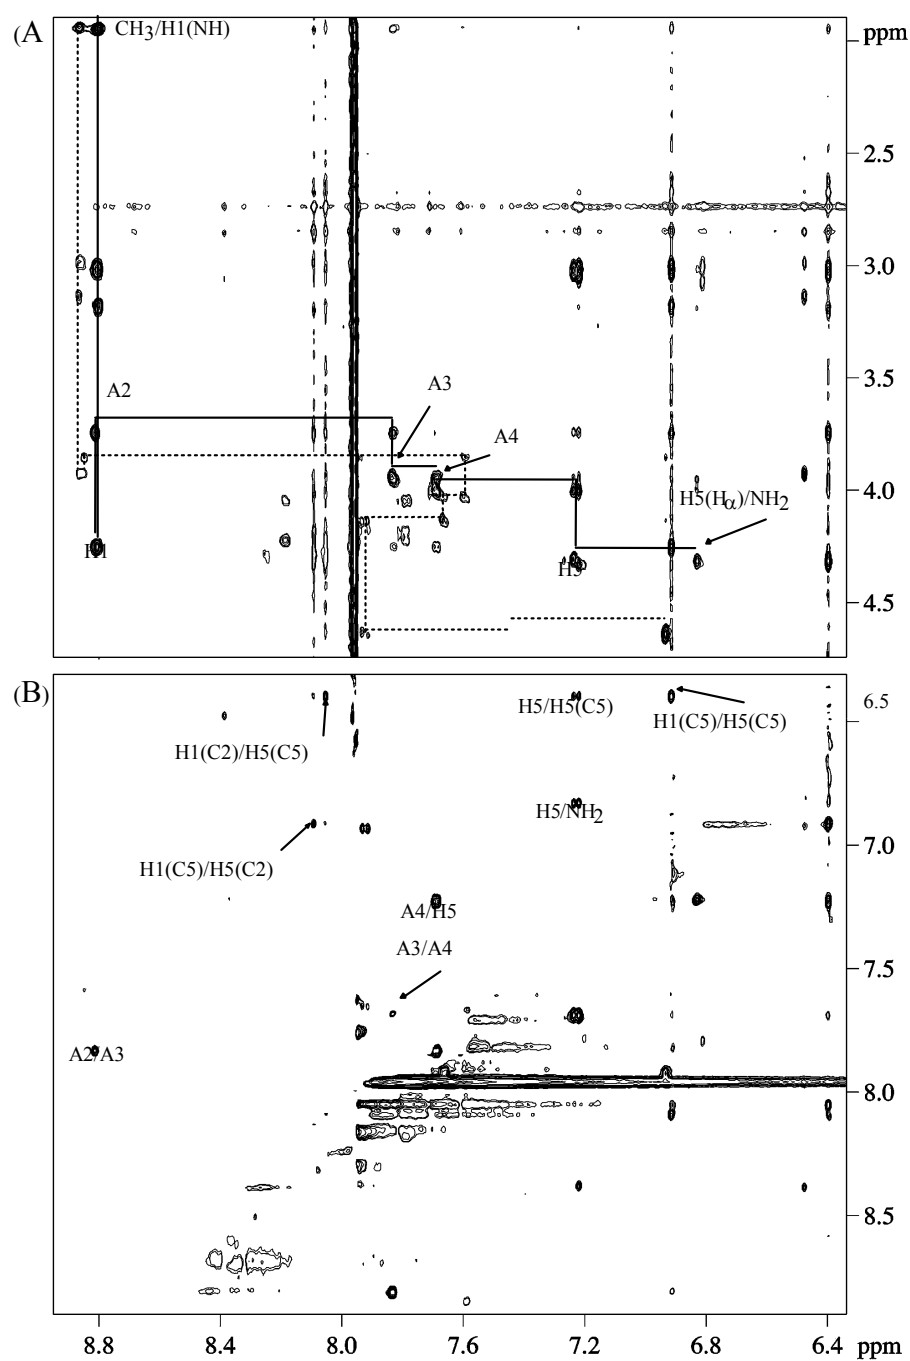

**Figure S4.** 500 MHz T-ROESY spectrum (298 K) for **2a** and **2b** in  $\text{dmf-}d^7$  (mixing time 250 ms, spin-lock 16dB (3kHz)). (A) Sequential connectivity for the major product **2a** (solid line) and a linkage isomer **2b** (dashed line). The sequential connectivity for the less

abundant linkage isomer **2c** is not shown. Intra-residue NH-CH $\alpha$  cross-peaks are labeled for His (H1, H5) and Ala (A2, A3, A4) residues of **2a**. Sequential cross-peaks from N-terminal acetyl (CH<sub>3</sub>) and C-terminal amide (NH<sub>2</sub>) groups are also shown. (B) Amide NH-NH cross-peaks are labeled by their residue numbers in **2a** and aromatic His cross-peaks are labeled by residue number and imidazole ring position (C2 or C5).

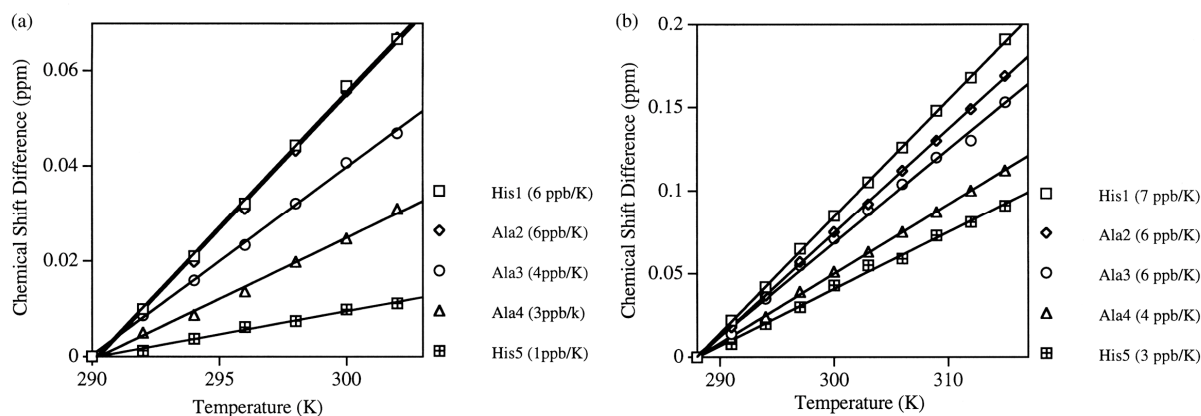

**Figure S5.** Temperature dependence of the amide NH chemical shifts for **2a**. Line slopes indicating temperature coefficients ( $\Delta\delta/T$ ) for each residue are shown (in brackets) in the legend. (a) in  $\text{dmf-}d_7$  and (b) in 90%  $\text{H}_2\text{O}$  10%  $\text{D}_2\text{O}$ .

A/

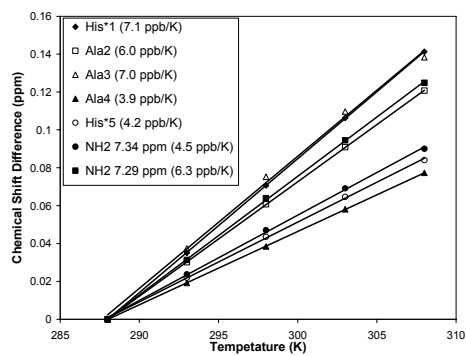

B/

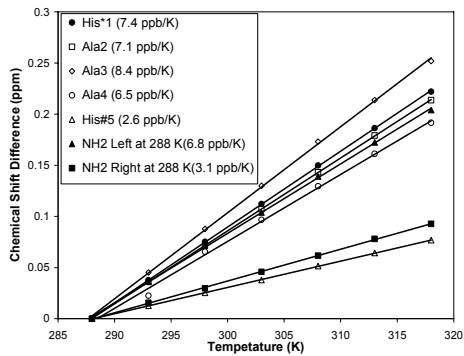

**Figure S6.** Temperature dependence of the amide NH chemical shifts in 90% H<sub>2</sub>O 10% D<sub>2</sub>O. (A) for **7** and (B) for **8**. Line slopes indicating temperature coefficients ( $\Delta\delta/T$ ) for each residue are shown (in brackets) in the inserts.



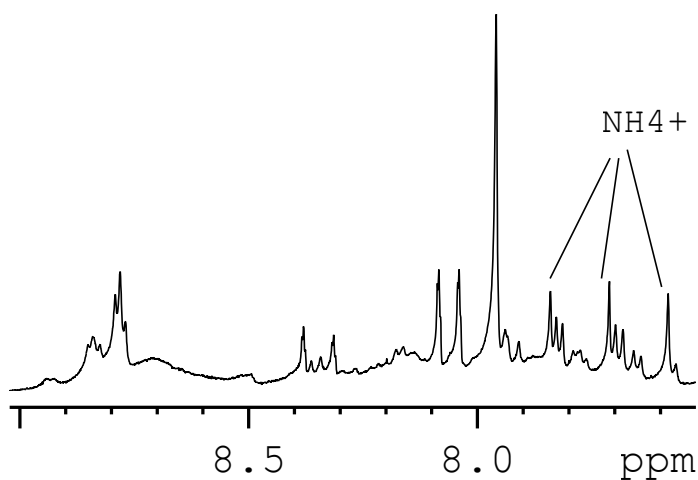

**Figure S7.** 500 MHz  $^1\text{H}$  NMR spectrum shows the signal for  $\text{NH}_4^+$  ion in DMF solution for reaction between **1** and  $[\text{Pd}(\text{en})(\text{ONO}_2)_2]$  aged for 7 days. Approximately 50% of the peptide  $\text{H5-CO-NH}_2$  has been hydrolysed to peptide- $\text{H5-CO}_2\text{H}$  and  $\text{NH}_4^+$ .

**Table S1**  $^1\text{H}$  chemical shifts for free peptide **3,4, 5** and **6** in dmf- $d^7$ 

| <b>3</b>              | <b>NH</b> | <b>H<sub><math>\alpha</math></sub></b> | <b>H<sub><math>\beta</math></sub></b> | <b>Other</b>                                                              |
|-----------------------|-----------|----------------------------------------|---------------------------------------|---------------------------------------------------------------------------|
| Ac-His*1              | 8.376     | 4.722                                  | 3.075, 3.262                          | CH <sub>3</sub> 1.861; N-CH <sub>3</sub> 3.901; H2 8.908; H5 7.442        |
| Ala2                  | 8.554     | 4.264                                  | 1.271                                 |                                                                           |
| Ala3                  | 8.110     | 4.227                                  | 1.260                                 |                                                                           |
| Ala4                  | 7.944     | 4.200                                  | 1.210                                 |                                                                           |
| His*5-NH <sub>2</sub> | 7.960     | 4.643                                  | 3.044, 3.294                          | N-CH <sub>3</sub> 3.922; H2 8.921; H5 7.382; NH <sub>2</sub> 7.476, 7.296 |

  

| <b>4</b>              | <b>NH</b> | <b>H<sub><math>\alpha</math></sub></b> | <b>H<sub><math>\beta</math></sub></b> | <b>Other</b>                                                              |
|-----------------------|-----------|----------------------------------------|---------------------------------------|---------------------------------------------------------------------------|
| Ac-His*1              | 8.471     | 4.734                                  | 3.264, 3.109                          | CH <sub>3</sub> 1.850; N-CH <sub>3</sub> 3.750; H2 8.987; H5 7.475        |
| Ala2                  | 8.684     | 4.277                                  | 1.283                                 |                                                                           |
| Ala3                  | 8.249     | 4.231                                  | 1.283                                 |                                                                           |
| Ala4                  | 7.956     | 4.184                                  | 1.244                                 |                                                                           |
| His#5-NH <sub>2</sub> | 8.034     | 4.602                                  | 3.279, 3.024                          | N-CH <sub>3</sub> 3.650; H2 8.883; H5 7.438; NH <sub>2</sub> 7.361, 7.228 |

  

| <b>5</b>              | <b>NH</b> | <b>H<sub><math>\alpha</math></sub></b> | <b>H<sub><math>\beta</math></sub></b> | <b>Other</b>                                                              |
|-----------------------|-----------|----------------------------------------|---------------------------------------|---------------------------------------------------------------------------|
| Ac-His#1              | 8.307     | 4.606                                  | 3.050, 3.166                          | CH <sub>3</sub> 1.860; N-CH <sub>3</sub> 3.871; H2 8.722; H5 7.411        |
| Ala2                  | 8.526     | 4.211                                  | 1.279                                 |                                                                           |
| Ala3                  | 8.440     | 4.234                                  | 1.279                                 |                                                                           |
| Ala4                  | 7.932     | 4.180                                  | 1.209                                 |                                                                           |
| His*5-NH <sub>2</sub> | 7.921     | 4.636                                  | 3.066, 3.298                          | N-CH <sub>3</sub> 3.942; H2 9.008; H5 7.444; NH <sub>2</sub> 7.444, 7.308 |

  

| <b>6</b>              | <b>NH</b> | <b>H<sub><math>\alpha</math></sub></b> | <b>H<sub><math>\beta</math></sub></b> | <b>Other</b>                                                              |
|-----------------------|-----------|----------------------------------------|---------------------------------------|---------------------------------------------------------------------------|
| Ac-His#1              | 8.346     | 4.606                                  | 3.058, 3.192                          | CH <sub>3</sub> 1.860; N-CH <sub>3</sub> 3.912; H2 8.753; H5 7.428        |
| Ala2                  | 8.592     | 4.224                                  | 1.291                                 |                                                                           |
| Ala3                  | 8.547     | 4.210                                  | 1.291                                 |                                                                           |
| Ala4                  | 7.901     | 4.160                                  | 1.234                                 |                                                                           |
| His#5-NH <sub>2</sub> | 7.952     | 4.570                                  | 3.023, 3.291                          | N-CH <sub>3</sub> 3.879; H2 8.929; H5 7.473; NH <sub>2</sub> 7.297, 7.251 |

**Table S2**  $^{15}\text{N}$  NMR chemical shift assignments for Pd(II) complexes and metallopeptides in (top) 90%  $\text{H}_2\text{O}$  10%  $\text{D}_2\text{O}$  and (bottom) DMF at 298K.

| Complexes in Water <sup>a</sup>                                           | pH  | $\delta_{\text{N}}$ | Ligand trans                            |
|---------------------------------------------------------------------------|-----|---------------------|-----------------------------------------|
| $[\text{Pd}(^{15}\text{en})(\text{OH}_2)_2]^{2+}$                         | 2.0 | -27.4               | $\text{OH}_2$                           |
| $[\text{Pd}(^{15}\text{en})(\text{OH}_2)(\text{OH})]^+$                   | 6.5 | -24.3<br>-29.0      | $\text{OH}_2$<br>$\text{OH}^-$          |
| $[\text{Pd}(^{15}\text{en})(\text{OH})_2]$                                | 6.5 | -29.5               | $\text{OH}^-$                           |
| $[\text{Pd}(^{15}\text{en})_2]^{2+}$                                      | 4   | -20.0               | $\text{NH}_2(\text{CH}_2)_2\text{NH}_2$ |
| $[\text{Pd}(^{15}\text{en})(\text{N1,N1-peptide})]^{2+}$ ( <b>2a</b> )    | 4   | -16.8<br>-17.2      | N1-His1<br>N1-His5                      |
| $[\text{Pd}(^{15}\text{en})(\text{N1,N3-peptide})]^{2+}$ ( <b>2b</b> )    | 4   | -15.3<br>-16.6      | N3-His5<br>N1-His1                      |
| $[\text{Pd}(^{15}\text{en})(\text{N3,N1-peptide})]^{2+}$ ( <b>2c</b> )    | 4   | -15.2<br>-17.6      | N3-His1<br>N1-His5                      |
| Complexes in DMF <sup>a</sup>                                             |     | $\delta_{\text{N}}$ | Ligand trans                            |
| $[\text{Pd}(^{15}\text{en})(\text{ONO}_2)_2]$                             |     | -24.7               | $\text{ONO}_2^-$                        |
| $[\text{Pd}(^{15}\text{en})(\text{ONO}_2)(\text{O-DMF})]^+$               |     | -24.7<br>-26.3      | $\text{ONO}_2^-$<br>O-DMF               |
| $[\text{Pd}(^{15}\text{en})(\text{O-DMF})_2]^{2+}$                        |     | -26.3               | O-DMF                                   |
| $[\text{Pd}(^{15}\text{en})(\text{ONO}_2)(\text{Cl})]$                    |     | -24.7<br>-16.7      | $\text{ONO}_2^-$<br>$\text{Cl}^-$       |
| $[\text{Pd}(^{15}\text{en})_2]^{2+}$                                      |     | -18.8               | $^{15}\text{en}$                        |
| $[\text{Pd}(^{15}\text{en})(\text{HAAAH-N1,N1})]^{2+}$ ( <b>2a</b> )      |     | -15.6<br>-16.2      | N1-H1<br>N1-H5                          |
| $[\text{Pd}(^{15}\text{en})(\text{HAAAH-N1,N3})]^{2+}$ ( <b>2b</b> )      |     | -14.8<br>-16.0      | N3-H5<br>N1-H1                          |
| $[\text{Pd}(^{15}\text{en})(\text{HAAAH-N3,N1})]^{2+}$ ( <b>2c</b> )      |     | -14.7<br>-16.6      | N3-H1<br>N1-H5                          |
| $[\text{Pd}(^{15}\text{en})(\text{H}^*\text{AAAH}^*)]^{2+}$ ( <b>7</b> )  |     | -16.01<br>-16.38    | N1-H*1<br>N1-H*5                        |
| $[\text{Pd}(^{15}\text{en})(\text{H}^*\text{AAAH}^\#)]^{2+}$ ( <b>8</b> ) |     | -14.99<br>-15.92    | N1-H*1<br>N3-H*5                        |
| $[\text{Pd}(^{15}\text{en})(\text{H}^\#\text{AAAH}^*)]^{2+}$ ( <b>9</b> ) |     | -14.56<br>-16.56    | N3-H*1<br>N1-H*5                        |

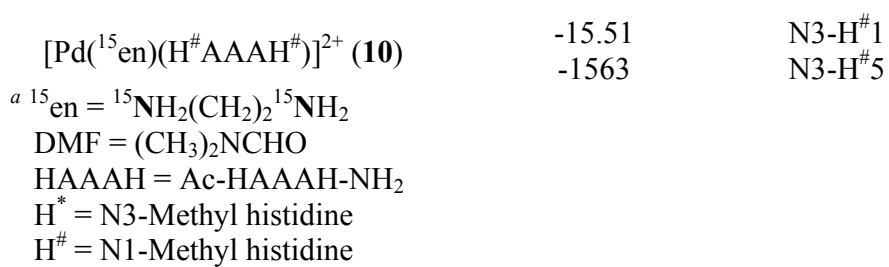

**Table S3**  $^1\text{H}$  and  $^{13}\text{C}$  chemical shifts for free peptide, Ac-HAAAH-NH<sub>2</sub> (**1**), complexes (**2a**), (**2b**) and (**2c**) in Water and DMF-*d*<sup>7</sup> at 298K

| Complexes in water          |                 | Ac-HAAAH-NH <sub>2</sub> |                     | (2a) <sup>a</sup>   |                     | (2b) <sup>b</sup>   |                     | (2c) <sup>c</sup>   |                     |
|-----------------------------|-----------------|--------------------------|---------------------|---------------------|---------------------|---------------------|---------------------|---------------------|---------------------|
| Residues                    |                 | $\delta_{\text{H}}$      | $\delta_{\text{C}}$ | $\delta_{\text{H}}$ | $\delta_{\text{C}}$ | $\delta_{\text{H}}$ | $\delta_{\text{C}}$ | $\delta_{\text{H}}$ | $\delta_{\text{C}}$ |
| <b>His1</b>                 | N-H             | 8.375                    | ---                 | 8.411               | ---                 | 8.450               | ---                 | 8.377               | ---                 |
|                             | C $\alpha$ -H   | 4.562                    | 52.94               | 4.258               | 55.03               | 4.663               | 55.34               | 4.099               | 53.33               |
|                             | CH <sub>2</sub> | 3.128                    | 26.85               | 3.003               | 26.40               | 3.232               | 26.43               | 2.923               | 30.00               |
|                             | C=O             | ---                      | 174.48              | ---                 | 173.06              | ---                 | 172.80              | ---                 | 173.16              |
|                             | C2-H            | 8.556                    | 134.07              | 7.707               | 137.24              | 8.033               | 137.48              | 7.591               | 137.56              |
| <i>Imidazole atoms</i>      | C4              | ---                      | 128.94              | ---                 | 128.04              | ---                 | 127.72              | ---                 | 125.77              |
|                             | C5-H            | 7.584                    | 117.74              | 6.572               | 126.03              | 6.975               | 125.77              | 6.603               | 116.65              |
| <b>His5</b>                 | N-H             | 8.412                    | ---                 | 7.645               | ---                 | 7.884               | ---                 | 7.928               | ---                 |
|                             | C $\alpha$ -H   | 4.546                    | 52.63               | 4.489               | 53.97               | 4.489               | 52.56               | 4.382               | 52.42               |
|                             | CH <sub>2</sub> | 3.176                    | 26.77               | 3.058               | 26.66               | 3.013               | 26.37               | 3.023               | 29.37               |
|                             | C=O             | ---                      | 174.61              | ---                 | 174.88              | ---                 | 174.67              | ---                 | 174.56              |
|                             | C2-H            | 8.556                    | 134.02              | 7.612               | 137.23              | 7.974               | 137.35              | 7.410               | 137.28              |
| <i>Imidazole atoms</i>      | C4              | ---                      | 128.91              | ---                 | 127.18              | ---                 | 125.86              | ---                 | 126.88              |
|                             | C5-H            | 7.588                    | 117.71              | 6.745               | 125.10              | 7.012               | 116.29              | 6.471               | 125.39              |
| <b>Ala2</b>                 | N-H             | 8.394                    | ---                 | 8.265               | ---                 | 8.321               | ---                 | 8.200               | ---                 |
|                             | C $\alpha$ -H   | 4.160                    | 50.19               | 3.849               | 51.67               | 3.945               | 51.57               | 3.906               | 50.53               |
|                             | C=O             | ---                      | 175.19              | ---                 | 175.64              | ---                 | 175.57              | ---                 | 175.45              |
|                             | CH <sub>3</sub> | 1.317                    | 16.89               | 1.288               | 15.82               | 1.307               | 15.83               | 1.241               | 15.71               |
| <b>Ala3</b>                 | N-H             | 8.300                    | ---                 | 7.783               | ---                 | 7.900               | ---                 | 8.082               | ---                 |
|                             | C $\alpha$ -H   | 4.145                    | 50.11               | 4.134               | 51.17               | 4.215               | 51.33               | 4.090               | 49.94               |
|                             | C=O             | ---                      | 175.26              | ---                 | 176.13              | ---                 | 176.10              | ---                 | 175.93              |
|                             | CH <sub>3</sub> | 1.326                    | 16.86               | 1.360               | 15.96               | 1.279               | 15.88               | 1.341               | 15.96               |
| <b>Ala4</b>                 | N-H             | 8.256                    | ---                 | 7.817               | ---                 | 7.913               | ---                 | 7.963               | ---                 |
|                             | C $\alpha$ -H   | 4.141                    | 49.96               | 4.133               | 50.27               | 4.115               | 50.97               | 4.222               | 49.77               |
|                             | C=O             | ---                      | 175.07              | ---                 | 174.93              | ---                 | 175.04              | ---                 | 175.03              |
|                             | CH <sub>3</sub> | 1.289                    | 16.76               | 1.198               | 16.29               | 1.184               | 16.12               | 1.284               | 16.76               |
| <b>Acetyl</b>               | CH <sub>3</sub> | 1.943                    | 22.09               | 1.967               | 21.93               | 1.913               | 21.82               | 1.937               | 21.99               |
|                             | C=O             | ---                      | 172.20              | ---                 | 163.23              | ---                 | 162.94              | ---                 | 162.65              |
| <b>NH<sub>2</sub></b>       | N-H             | 7.548                    | ---                 | 7.334               | ---                 | 7.384               | ---                 | 7.385               | ---                 |
|                             |                 | 7.177                    |                     | 7.194               |                     | 7.165               |                     | *                   |                     |
| <b>Ethylenediamine (en)</b> | CH <sub>2</sub> | ---                      | ---                 | 2.594               | 46.86               | 2.641               | 47.13               | 2.824               | 47.62               |

| Complexes in DMF               |                 | <b>1</b>   |            | <b>2a</b>  |            | <b>2b</b>  |            | <b>2c</b>  |            |
|--------------------------------|-----------------|------------|------------|------------|------------|------------|------------|------------|------------|
|                                |                 | $\delta_H$ | $\delta_C$ | $\delta_H$ | $\delta_C$ | $\delta_H$ | $\delta_C$ | $\delta_H$ | $\delta_C$ |
| <b>His1</b>                    | N-H             | 8.35       | ---        | 8.79       | ---        | 8.77       | ---        | 8.34       | ---        |
|                                | C $\alpha$ -H   | 4.66       | 53.63      | 4.26       | 56.54      | 3.93       | 57.60      | 5.18       | *          |
|                                | CH <sub>2</sub> | 3.02       | 28.85      | 3.14       | 27.17      | 3.08       | 31.33      | 3.20       | 27.20      |
|                                | C=O             | ---        | 172.07     | ---        | 173.89     | ---        | 175.30     | ---        | *          |
|                                | C2-H            | 9.00       | 134.89     | 8.06       | 138.44     | 7.97       | 137.75     | 8.28       | 138.33     |
| <i>Imidazole atoms</i>         | C4              | ---        | 131.07     | ---        | 128.46     | ---        | 128.15     | ---        | 137.05     |
|                                | C5-H            | 7.48       | 118.20     | 6.92       | 126.77     | 6.49       | 126.20     | 7.24       | 117.50     |
| <b>His5</b>                    | N-H             | 7.94       | ---        | 7.22       | ---        | 7.88       | ---        | 7.74       | ---        |
|                                | C $\alpha$ -H   | 4.70       | 52.81      | 4.32       | 53.50      | 4.67       | 51.92      | 4.35       | 53.20      |
|                                | CH <sub>2</sub> | 3.04       | 28.84      | 3.03       | 27.78      | *          | 31.30      | *          | 26.98      |
|                                | C=O             | ---        | 172.80     | ---        | 173.43     | ---        | *          | ---        | 173.30     |
|                                | C2-H            | 8.96       | 134.77     | 8.09       | 138.33     | 8.35       | 138.44     | 7.94       | 138.13     |
| <i>Imidazole atoms</i>         | C4              | ---        | 130.93     | ---        | 130.21     | ---        | 139.00     | ---        | 129.38     |
|                                | C5-H            | 7.46       | 118.13     | 6.40       | 125.10     | 6.94       | 115.00     | 6.80       | 126.70     |
| <b>Ala2</b>                    | N-H             | 8.57       | ---        | 8.80       | ---        | 8.78       | ---        | 8.92       | ---        |
|                                | C $\alpha$ -H   | 4.30       | 50.73      | 3.75       | 53.05      | 3.87       | 52.43      | 4.19       | 50.83      |
|                                | C=O             | ---        | 174.50     | ---        | 176.50     | ---        | 174.95     | ---        | 173.30     |
|                                | CH <sub>3</sub> | 1.29       | 17.48      | 1.30       | 16.37      | 1.32       | 16.96      | 1.38       | 16.95      |
| <b>Ala3</b>                    | N-H             | 8.40       | ---        | 7.83       | ---        | 7.79       | ---        | 7.75       | ---        |
|                                | C $\alpha$ -H   | 4.30       | 50.38      | 3.95       | 52.14      | 4.06       | 51.54      | 4.20       | 49.81      |
|                                | C=O             | ---        | 173.80     | ---        | 175.39     | ---        | 174.05     | ---        | 173.92     |
|                                | CH <sub>3</sub> | 1.28       | 17.44      | 1.34       | 16.48      | 1.31       | 17.63      | 1.25       | 18.30      |
| <b>Ala4</b>                    | N-H             | 7.97       | ---        | 7.68       | ---        | 7.63       | ---        | 8.13       | ---        |
|                                | C $\alpha$ -H   | 4.23       | 50.28      | 4.01       | 50.83      | 4.15       | 51.24      | 4.05       | 50.62      |
|                                | C=O             | ---        | 173.13     | ---        | 173.56     | ---        | 174.30     | ---        | 174.03     |
|                                | CH <sub>3</sub> | 1.22       | 17.34      | 1.24       | 16.60      | 1.16       | 17.65      | 1.23       | 16.37      |
| <b>Acetyl</b>                  | CH <sub>3</sub> | 1.86       | 22.65      | 1.95       | 22.72      | 1.94       | 22.62      | 1.83       | *          |
|                                | C=O             | ---        | 170.99     | ---        | 172.49     | ---        | 172.52     | ---        | 171.30     |
| <b>NH<sub>2</sub></b>          | N-H             | 7.30       | ---        | 6.84       | ---        | 6.95       | ---        | 7.18       | ---        |
| <b>Ethylenediamine</b><br>(en) | CH <sub>2</sub> | ---        | ---        | 2.74       | 47.75      | 2.71       | 48.50      | 2.81       | 47.92      |

<sup>a</sup> (**2a**) [Pd(en)(N1-AcHAAAH-NH<sub>2</sub>-N1)]<sup>2+</sup><sup>b</sup> (**2b**) [Pd(en)(N1-AcHAAAH-NH<sub>2</sub>-N3)]<sup>2+</sup><sup>c</sup> (**2c**) [Pd(en)(N3-AcHAAAH-NH<sub>2</sub>-N1)]<sup>2+</sup>

--- Not applicable

\* Not observed

**Table S4**  $^1\text{H}$  chemical shifts for free peptide **7**, **8**, **9** and **10** in dmf-d<sup>7</sup>

| <b>7</b>                           | <b>NH</b> | <b>H<sub><math>\alpha</math></sub></b> | <b>H<sub><math>\beta</math></sub></b> | <b>Other</b>                                                              |
|------------------------------------|-----------|----------------------------------------|---------------------------------------|---------------------------------------------------------------------------|
| Ac-His <sup>*</sup> 1              | 8.793     | 4.247                                  | 2.994, 3.181                          | CH <sub>3</sub> 1.951; N-CH <sub>3</sub> 3.706; H2 8.068; H5 6.926        |
| Ala2                               | 8.793     | 3.649                                  | 1.307                                 |                                                                           |
| Ala3                               | 7.830     | 4.010                                  | 1.378                                 |                                                                           |
| Ala4                               | 7.747     | 4.061                                  | 1.248                                 |                                                                           |
| His <sup>*</sup> 5-NH <sub>2</sub> | 7.344     | 4.322                                  | 3.062, 3.149                          | N-CH <sub>3</sub> 3.728; H2 8.101; H5 6.488; NH <sub>2</sub> 7.334, 6.926 |
| <b>8</b>                           | <b>NH</b> | <b>H<sub><math>\alpha</math></sub></b> | <b>H<sub><math>\beta</math></sub></b> | <b>Other</b>                                                              |
| Ac-His <sup>*</sup> 1              | 8.745     | 4.055                                  | 3.041, 2.681                          | CH <sub>3</sub> 1.950; N-CH <sub>3</sub> 3.660; H2 8.021; H5 6.556        |
| Ala2                               | 8.760     | 3.914                                  | 1.303                                 |                                                                           |
| Ala3                               | 7.925     | 4.040                                  | 1.317                                 |                                                                           |
| Ala4                               | 7.859     | 4.125                                  | 1.219                                 |                                                                           |
| His <sup>#</sup> 5-NH <sub>2</sub> | 7.837     | 4.505                                  | 2.696, 2.858                          | N-CH <sub>3</sub> 3.790; H2 8.310; H5 6.962; NH <sub>2</sub> 7.379, 7.057 |
| <b>9</b>                           | <b>NH</b> | <b>H<sub><math>\alpha</math></sub></b> | <b>H<sub><math>\beta</math></sub></b> | <b>Other</b>                                                              |
| Ac-His <sup>#</sup> 1              | 8.386     | 5.069                                  | 3.117, 3.268                          | CH <sub>3</sub> 1.850; N-CH <sub>3</sub> 3.750; H2 8.263; H5 7.258        |
| Ala2                               | 8.738     | 3.966                                  | 1.315                                 |                                                                           |
| Ala3                               | 7.806     | 4.202                                  | 1.268                                 |                                                                           |
| Ala4                               | 8.070     | 4.051                                  | 1.231                                 |                                                                           |
| His <sup>*</sup> 5-NH <sub>2</sub> | 7.644     | 4.390                                  | 3.023, 3.277                          | N-CH <sub>3</sub> 3.650; H2 8.021; H5 6.859; NH <sub>2</sub> 7.258, 7.199 |
| <b>10</b>                          | <b>NH</b> | <b>H<sub><math>\alpha</math></sub></b> | <b>H<sub><math>\beta</math></sub></b> | <b>Other</b>                                                              |
| Ac-His <sup>#</sup> 1              | 8.373     | 4.620                                  | 3.115, 3.301                          | CH <sub>3</sub> 1.860; N-CH <sub>3</sub> 3.871; H2 8.233; H5 7.082        |
| Ala2                               | 8.504     | 4.319                                  | 1.432                                 |                                                                           |
| Ala3                               | 8.233     | 4.053                                  | 1.339                                 |                                                                           |
| Ala4                               | 7.885     | 4.139                                  | 1.259                                 |                                                                           |
| His <sup>#</sup> 5-NH <sub>2</sub> | 8.046     | 4.339                                  | 3.308, 3.507                          | N-CH <sub>3</sub> 3.942; H2 8.281; H5 7.082; NH <sub>2</sub> 7.444, 7.308 |

**Table S5.** NOE derived distance and  $^3J_{\text{NHCH}\alpha}$  derived  $\phi$ -angle restraints use for calculating the solution structure of **2a** in dmf- $d^7$  (A) and in water (B).

(A)

| Atom A             | Atom B                 | Upper Distance Constraint (Å) & Comment |
|--------------------|------------------------|-----------------------------------------|
| Ac-CH <sub>3</sub> | His1-NH                | 4.2 Strong + 1.5 Å correction           |
| Ac-CH <sub>3</sub> | Ala3-NH                | 7.5 Very weak + 1.5 Å correction        |
| His1-H $\alpha$    | His1-NH                | 3.5 Medium                              |
| His1-H $\alpha$    | Ala2-NH                | 3.5 Medium                              |
| His1-H $\alpha$    | His1-H5                | 5.0 Weak                                |
| His1-H $\alpha$    | Ala3-NH                | 6.0 Very Weak                           |
| His1-H $\alpha$    | Ala4-NH                | 6.0 Very Weak                           |
| His1-H $\beta$ 1   | His1-NH                | 3.5 Medium                              |
| His1-H $\beta$ 2   | His1-NH                | 3.5 Medium                              |
| His1-H5            | Ala2-H $\alpha$        | 6.0 Very Weak                           |
| His1-H5            | Ala4-H $\beta$ *       | 7.0 Very Weak + 1.0 Å correction        |
| His1-H5            | His5-H5                | 3.5 Medium                              |
| His1-H5            | His5-H2                | 5.0 Weak                                |
| His1-H2            | His5-H5                | 5.0 Weak                                |
| His1-H2            | Ala4-H $\beta$ *       | 7.0 Very Weak + 1.0 Å correction        |
| Ala2-H $\alpha$    | Ala2-NH                | 3.5 Medium                              |
| Ala2-H $\alpha$    | Ala3-NH                | 5.0 Weak                                |
| Ala2-H $\alpha$    | Ala4-NH                | 6.0 Very Weak                           |
| Ala2-H $\alpha$    | His5-NH                | 6.0 Very Weak                           |
| Ala2-H $\alpha$    | His5-H $\beta$ *       | 6.0 Weak + 1.0 Å correction             |
| Ala2-H $\alpha$    | His5-H5                | 3.5 Medium                              |
| Ala2-H $\beta$ *   | Ala2-NH                | 4.2 Strong + 1.5 Å correction           |
| Ala2-H $\beta$ *   | Ala3-NH                | 6.5 Weak + 1.5 Å correction             |
| Ala2-NH            | Ala3-NH                | 3.5 Medium                              |
| Ala3-H $\alpha$    | Ala3-NH                | 5.0 Weak                                |
| Ala3-H $\alpha$    | Ala4-NH                | 5.0 Weak                                |
| Ala3-H $\alpha$    | His5-NH                | 6.0 Very Weak                           |
| Ala3-H $\alpha$    | His5-NH <sub>2</sub> * | 7.0 Very Weak + 1.5 Å correction        |
| Ala3-H $\beta$ *   | Ala3-NH                | 4.2 Strong + 1.5 Å correction           |
| Ala3-H $\beta$ *   | Ala4-NH                | 6.5 Weak + 1.5 Å correction             |



|                  |                        |                                  |
|------------------|------------------------|----------------------------------|
| Ala3-NH          | Ala4-H $\beta$ *       | 7.5 Very Weak + 1.5 Å correction |
| Ala3-NH          | Ala4-NH                | 3.5 Medium                       |
| Ala4-H $\alpha$  | Ala4-NH                | 5.0 Weak                         |
| Ala4-H $\alpha$  | His5-NH                | 5.0 Weak                         |
| Ala4-H $\alpha$  | His5-NH <sub>2</sub> * | 6.5 Weak + 1.5 Å correction      |
| Ala4-H $\beta$ * | Ala4-NH                | 5.0 Medium + 1.5 Å correction    |
| Ala4-H $\beta$ * | His5-NH                | 6.5 Weak + 1.5 Å correction      |
| Ala4-H $\beta$ * | His5-H5                | 6.5 Weak + 1.5 Å correction      |
| Ala4-H $\beta$ * | His5-H2                | 7.5 Very Weak + 1.5 Å correction |
| Ala4-NH          | His5-NH                | 3.5 Medium                       |
| His5-H $\alpha$  | His5-NH                | 3.5 Medium                       |
| His5-H $\alpha$  | His5-H5                | 5.0 Weak                         |
| His5-H $\alpha$  | His5-NH <sub>2</sub> * | 6.0 Weak + 1.0 Å correction      |
| His5-H $\beta$ * | His5-NH                | 5.0 Medium + 1.5 Å correction    |
| His5-H5          | His5-NH                | 5.0 Weak                         |

 $\phi$ -angle restraints

| Residue | <sup>3</sup> J <sub>NHCH<math>\alpha</math></sub> | $\phi$ -restraint |
|---------|---------------------------------------------------|-------------------|
| His1    | 4.2                                               | -65 ± 30°         |
| Ala2    | 3.5                                               | -65 ± 30°         |
| Ala3    | 5.3                                               | -65 ± 30°         |

## H-Bond restraints

|                 |                 |                          |
|-----------------|-----------------|--------------------------|
| His5-N <u>H</u> | His1-C <u>O</u> | 2.3 (Lower limit 1.58 Å) |
| His5-NH         | His1-C <u>O</u> | 3.2 (Lower limit 1.58 Å) |
| Ala4-N <u>H</u> | Ac-C <u>O</u>   | 2.3 (Lower limit 1.58 Å) |
| Ala4-NH         | Ac-C <u>O</u>   | 3.2 (Lower limit 1.58 Å) |

## (B)

| Atom A             | Atom B  | Upper Distance Constraint (Å) & Comment |
|--------------------|---------|-----------------------------------------|
| Ac-CH <sub>3</sub> | His1-NH | 4.2 Strong + 1.5 Å correction           |
| Ac-CH <sub>3</sub> | Ala3-NH | 7.5 Very weak + 1.5 Å correction        |
| His1-H $\alpha$    | His1-NH | 3.5 Medium                              |
| His1-H $\alpha$    | Ala2-NH | 3.5 Medium                              |
| His1-H $\alpha$    | His1-H5 | 5.0 Weak                                |

|                  |                        |                                  |
|------------------|------------------------|----------------------------------|
| His1-H $\alpha$  | Ala3-NH                | 6.0 Very Weak                    |
| His1-H $\alpha$  | Ala4-NH                | 5.0 Very Weak                    |
| His1-H $\beta$ 1 | His1-NH                | 3.5 Medium                       |
| His1-H $\beta$ 2 | His1-NH                | 3.5 Medium                       |
| His1-H5          | Ala2-HN                | 6.0 Very Weak                    |
| His1-H5          | Ala4-H $\beta$ #       | 7.0 Very Weak + 1.0 Å correction |
| His1-H5          | His5-H5                | 3.5 Medium                       |
| His1-H5          | His5-H2                | 5.0 Weak                         |
| His1-H2          | His5-H5                | 5.0 Weak                         |
| His1-HN          | Ala2-HN                | 5.0 Weak                         |
| Ala2-H $\alpha$  | Ala2-NH                | 3.5 Medium                       |
| Ala2-H $\alpha$  | Ala3-NH                | 3.5 Medium                       |
| Ala2-H $\alpha$  | His5-NH                | 5.0 Weak                         |
| Ala2-H $\alpha$  | His5-H $\beta$ #       | 7.0 Very Weak + 1.0 Å correction |
| Ala2-H $\alpha$  | His5-H5                | 5.0 Weak                         |
| Ala2-H $\beta$ # | Ala2-NH                | 5.0 Weak + 1.5 Å correction      |
| Ala2-NH          | Ala3-NH                | 3.5 Medium                       |
| Ala3-H $\alpha$  | Ala3-NH                | 2.7 Strong                       |
| Ala3-H $\alpha$  | Ala4-NH                | 2.7 Strong                       |
| Ala3-H $\alpha$  | His5-NH                | 7.0 Very Weak                    |
| Ala3-H $\beta$ # | Ala3-NH                | 4.2 Strong + 1.5 Å correction    |
| Ala3-H $\beta$ # | Ala4-NH                | 7.5 Weak + 1.5 Å correction      |
| Ala3-NH          | Ala4-H $\beta$ #       | 6.5 Very Weak + 1.0 Å correction |
| Ala4-H $\alpha$  | Ala4-NH                | 2.7 Strong                       |
| Ala4-H $\alpha$  | His5-NH                | 5.0 Weak                         |
| Ala4-H $\alpha$  | His5-NH <sub>2</sub> # | 7.5 Weak + 1.0 Å correction      |
| Ala4-H $\beta$ # | Ala4-NH                | 4.2 Strong + 1.0 Å correction    |
| Ala4-H $\beta$ # | His5-NH                | 6.5 Weak + 1.5 Å correction      |
| Ala4-H $\beta$ # | His5-H5                | 6.5 Weak + 1.5 Å correction      |
| Ala4-H $\beta$ # | His5-H2                | 7.5 Very Weak + 1.5 Å correction |
| Ala4-NH          | His5-NH                | 3.5 Medium                       |
| His5-H $\alpha$  | His5-NH                | 3.5 Medium                       |
| His5-H□          | His5-H5                | 5.0 Weak                         |
| His5-H $\alpha$  | His5-NH <sub>2</sub> # | 7.0 Weak + 1.0 Å correction      |
| His5-H $\beta$ # | His5-NH                | 5.0 Medium + 1.5 Å correction    |
| His5-H5          | His5-NH                | 5.0 Weak                         |

$\phi$ -angle restraints

| Residue | $^3J_{\text{NHCH}\alpha}$ (Hz) | $\phi$ -restraint  |
|---------|--------------------------------|--------------------|
| His1    | 4.9                            | $-60 \pm 30^\circ$ |
| Ala2    | 4.0                            | $-60 \pm 30^\circ$ |
| Ala3    | 5.0                            | $-60 \pm 30^\circ$ |

## H-Bond restraints

Distance ( $\text{\AA}$ )

|                  |                 |                                      |
|------------------|-----------------|--------------------------------------|
| His5-N <u>H</u>  | His1-C <u>O</u> | 2.3 (Lower limit 1.58 $\text{\AA}$ ) |
| His5- <u>N</u> H | His1-C <u>O</u> | 3.2 (Lower limit 1.58 $\text{\AA}$ ) |
| Ala4-N <u>H</u>  | Ac-C <u>O</u>   | 2.3 (Lower limit 1.58 $\text{\AA}$ ) |
| Ala4- <u>N</u> H | Ac-C <u>O</u>   | 3.2 (Lower limit 1.58 $\text{\AA}$ ) |

**Table S6**  $^3J_{\text{NHCH}\alpha}$  coupling constants for **2a**, **7**, **8**, **9** in DMF- $d^7$  and 10%D<sub>2</sub>O 90% H<sub>2</sub>O

| Complexes | $^3J_{\text{NHCH}\alpha}$ (Hz) in DMF/Water |         |         |         |         |
|-----------|---------------------------------------------|---------|---------|---------|---------|
|           | His1                                        | Ala2    | Ala3    | Ala4    | His5    |
| <b>2a</b> | 4.2/4.9                                     | 3.5/4.0 | 5.3/5.0 | 6.3/6.0 | 8.4/7.5 |
| <b>7</b>  | 4.2/4.8                                     | 4.2/4.0 | 5.2/4.6 | 6.6/6.5 | 7.6/7.4 |
| <b>8</b>  | 4.5/4.8                                     | 5.2/4.1 | 4.7/--- | 6.1/5.3 | 8.7/6.1 |
| <b>9</b>  | 7.6/6.6                                     | 6.1/4.4 | 6.1/6.2 | 6.1/6.3 | 8.5/7.6 |

---: Broad signal.

**Table S7** NOE table for the complex **7** with two N3-methylated imidazole rings in dmf- $d^7$  and water.

|                     |                     | <b>DMF</b>          | <b>Water</b>        |
|---------------------|---------------------|---------------------|---------------------|
| <b>Atom A</b>       | <b>Atom B</b>       | <b>Pd + H*AAAH*</b> | <b>Pd + H*AAAH*</b> |
| Ac - CH3            | His 1 - NH          | Strong (18)         | Strong (18)         |
| Ac - CH3            | His 1 - C2H         |                     | Medium (15)         |
| Ac - CH3            | Ala 2 - NH          |                     | Weak (9)            |
| Ac - CH3            | Ala 3 - NH          | Very weak (5)       | Weak (10)           |
| Ac - CH3            | Ala 4 - NH          |                     | Weak (10)           |
| His 1 - H $\alpha$  | His 1 - NH          | Strong (17)         | Strong (17)         |
| His 1 - H $\alpha$  | His 1 - H $\beta$ 1 |                     | Strong (18)         |
| His 1 - H $\alpha$  | His 1 - H $\beta$ 2 |                     | Strong (18)         |
| His 1 - H $\alpha$  | His 1 - C5H         | Strong (17)         | Strong (18)         |
| His 1 - H $\alpha$  | Ala 2 - NH          | Strong (17)         | Strong (18)         |
| His 1 - H $\alpha$  | Ala 2 - H $\alpha$  |                     | Strong (18)         |
| His 1 - H $\alpha$  | Ala 3 - NH          | Very weak (4)       | Weak (10)           |
| His 1 - H $\alpha$  | Ala 4 - NH          | Weak (7)            | Weak (9)            |
| His 1 - H $\beta$ 1 | His 1 - NH          | Medium (15)         | Strong (17)         |
| His 1 - H $\beta$ 1 | His 1 - C5H         | Strong (16)         | Strong (18)         |
| His 1 - H $\beta$ 1 | Ala 2 - NH          |                     | Medium (12)         |
| His 1 - H $\beta$ 1 | Ala 3 - NH          |                     | Very Weak (2)       |
| His 1 - H $\beta$ 2 | His 1 - NH          | Medium (15)         | Strong (17)         |
| His 1 - H $\beta$ 2 | His 1 - C5H         | Medium (12)         | Strong (18)         |
| His 1 - H $\beta$ 2 | Ala 2 - NH          |                     | Medium (12)         |
| His 1 - H $\beta$ 2 | Ala 3 - NH          |                     | Very Weak (2)       |
| His 1 - C2H         | His 1 - C5H         | Weak (9)            | Strong (18)         |
| His 1 - C2H         | His 1 - CH3         | Strong (18)         | Strong (18)         |
| His 1 - C2H         | Ala 4 - H $\beta$ * | Weak (9)            | Medium (15)         |
| His 1 - C2H         | His 5 - C5H         | Medium (12)         | Strong (17)         |
| His 1 - C2H         | en - NH2            |                     | Strong (18)         |
| His 1 - C5H         | His 1 - NH          | Weak (8)            |                     |
| His 1 - C5H         | His 1 - CH3         | Weak (10)           | Medium (14)         |
| His 1 - C5H         | Ala 2 - NH          |                     | Weak (10)           |
| His 1 - C5H         | Ala 2 - H $\alpha$  |                     | Medium (14)         |

|                     |                      |                        |                            |
|---------------------|----------------------|------------------------|----------------------------|
| His 1 - C5H         | Ala 3 - NH           |                        | Weak (8)                   |
| His 1 - C5H         | Ala 3 - H $\beta$ *  | Very Weak (3)          | Medium (12)                |
| His 1 - C5H         | Ala 3/4 - H $\alpha$ | Weak (9) ???           |                            |
| His 1 - C5H         | Ala 4 - H $\alpha$   |                        | Medium (12)                |
| His 1 - C5H         | Ala 4 - H $\beta$ *  | Medium (12)            | Medium (15)                |
| His 1 - C5H         | His 5 - NH           | Very weak (4)          |                            |
| His 1 - C5H         | His 5 - H $\alpha$   | Medium (14)            |                            |
| His 1 - C5H         | His 5 - C2H          | Medium (14)            | Strong (18)                |
| His 1 - C5H         | His 5 - C5H          | Strong (16)            |                            |
| His 1 - C5H         | His 5 - CH3          |                        | Medium (14)                |
| His 1 - C5H         | His 5 - NH2*         | Very weak (2)          |                            |
| His 1 - C5H         | en - NH2             |                        | Strong (18)                |
| Ala 2 - H $\alpha$  | Ala 2 - NH           | Medium (13)            | Strong (18)                |
| Ala 2 - H $\alpha$  | Ala 2 - H $\beta$ *  |                        | Strong (18)                |
| Ala 2 - H $\alpha$  | Ala 3 - NH           | Weak (10)              | Strong (17)                |
| Ala 2 - H $\alpha$  | Ala 4 - NH           | Very weak (3)          | Weak (11)                  |
| Ala 2 - H $\alpha$  | His 5 - NH           | Very weak (5)          | Weak (8)                   |
| Ala 2 - H $\alpha$  | His 5 - H $\beta$ *  | Weak (11)              | Very Weak (6 & 4)          |
| Ala 2 - H $\alpha$  | His 5 - C5H          | Medium (14)            | Medium (13)                |
| Ala 2 - H $\beta$ * | Ala 2 - NH           | Strong (17)            | Strong (18)                |
| Ala 2 - H $\beta$ * | Ala 3 - NH           | Weak (11)              | Medium (15)                |
| Ala 2 - H $\beta$ * | His 5 - C2H          | Very weak (4)          |                            |
| Ala 2 - NH          | Ala 3 - NH           | Strong (16)            | Strong (17)                |
| Ala 3 - H $\alpha$  | Ala 3 - NH           | Medium (13)            | Strong (18)                |
| Ala 3 - H $\alpha$  | Ala 3 - H $\beta$ *  |                        | Strong (17)                |
| Ala 3 - H $\alpha$  | Ala 4 - NH           | Medium (13)            | Strong (18)                |
| Ala 3 - H $\alpha$  | His 5 - NH           | Medium (12)            | Maybe (too close to Ala 3) |
| Ala 3 - H $\alpha$  | His 5 - NH2*         | Very weak (mixed peak) |                            |
| Ala 3 - H $\beta$ * | Ala 3 - NH           | Strong (17)            | Strong (18)                |
| Ala 3 - H $\beta$ * | Ala 4 - NH           | Weak (10)              | Medium (14)                |
| Ala 3 - H $\beta$ * | Ala 4 - H $\alpha$   |                        | Medium (17)                |
| Ala 3 - H $\beta$ * | His 5 - C2H          | Very weak (2)          |                            |
| Ala 3 - H $\beta$ * | His 5 - C5H          | Very weak (5)          | Weak (10)                  |
| Ala 3 - NH          | Ala 4 - NH           | Medium (14)            |                            |

|                     |                     |               |                  |
|---------------------|---------------------|---------------|------------------|
| Ala 3 - NH          | His 5 - H $\beta$ 1 |               | Very Weak (4)    |
| Ala 4 - H $\alpha$  | Ala 4 - NH          | Medium (13)   | Strong (18)      |
| Ala 4 - H $\alpha$  | Ala 4 - H $\beta$ * |               | Medium (15)      |
| Ala 4 - H $\alpha$  | His 5 - NH          | Medium (12)   | Strong (18)      |
| Ala 4 - H $\alpha$  | His 5 - C5H         |               | Medium (14)      |
| Ala 4 - H $\alpha$  | His 5 - NH2*        | Very weak     | Weak (9 & 4)     |
| Ala 4 - H $\beta$ * | Ala 4 - NH          | Strong (17)   | Strong (18)      |
| Ala 4 - H $\beta$ * | His 5 - NH          | Weak (7)      | Medium (12)      |
| Ala 4 - H $\beta$ * | His 5 - C2H         | Very weak (2) |                  |
| Ala 4 - H $\beta$ * | His 5 - C5H         | Medium (12)   | Strong (17)      |
| Ala 4 - NH          | His 5 - NH          | Medium (15)   | Strong (18)      |
| His 5 - H $\alpha$  | His 5 - NH          | Medium (13)   | Strong (18)      |
| His 5 - H $\alpha$  | His 5 - H $\beta$ 1 |               | Strong (18)      |
| His 5 - H $\alpha$  | His 5 - H $\beta$ 2 |               | Strong (18)      |
| His 5 - H $\alpha$  | His 5 - C5H         | Strong (18)   | Strong (18)      |
| His 5 - H $\alpha$  | His 5 - NH2*        | Very weak     | Medium (16 & 10) |
| His 5 - H $\beta$ 1 | His 5 - NH          | Medium (14)   | Strong (18)      |
| His 5 - H $\beta$ 1 | His 5 - C5H         | Medium (12)   | Strong (18)      |
| His 5 - H $\beta$ 1 | His 5 - NH2*        |               | Weak (8 & 4)     |
| His 5 - H $\beta$ 2 | His 5 - NH          | Medium (14)   | Weak (10)        |
| His 5 - H $\beta$ 2 | His 5 - C5H         | Weak (11)     | Medium (13)      |
| His 5 - H $\beta$ 2 | His 5 - NH2*        |               | Weak (8 & 5)     |
| His 5 - C2H         | His 5 - C5H         | Weak (9)      | Medium (15)      |
| His 5 - C2H         | His 5 - CH3         | Strong (18)   | Strong (18)      |
| His 5 - C2H         | en - NH2            |               | Strong (18)      |
| His 5 - C5H         | His 5 - NH          | Weak (10)     |                  |
| His 5 - C5H         | His 5 - CH3         | Weak (10)     |                  |
| His 5 - C5H         | en - NH2            |               | Strong (18)      |
